# Radiomics analysis to predict pulmonary nodule malignancy using machine learning approaches

Matthew T. Warkentin<sup>1,2</sup>

Hamad Al-Sawaihey<sup>1</sup>

Stephen Lam<sup>3,4</sup>

Geoffrey Liu<sup>2,5</sup>

Brenda Diergaarde<sup>6</sup>

Jian-Min Yuan<sup>6</sup>

David O. Wilson<sup>7</sup>

Martin C. Tammemägi<sup>8</sup>

Sukhinder Atkar-Khattra<sup>3,4</sup>

Benjamin Grant<sup>5</sup>

Yonathan Brhane<sup>1</sup>

Elham Khodayari-Moez<sup>1</sup>

Kieran R. Campbell<sup>1,9,10,11,12,13</sup>

Rayjean J. Hung<sup>1,2</sup>

## Affiliations:

1. Prosserman Center for Population Health Research, Lunenfeld-Tanenbaum Research Institute, Sinai Health, Toronto, ON, Canada
2. Dalla Lana School of Public Health, University of Toronto, Toronto, ON, Canada
3. Department of Respiratory Medicine, Department of Medicine, University of British Columbia, Vancouver, BC, Canada
4. British Columbia Cancer Agency, Vancouver, BC, Canada
5. Department of Medical Oncology and Hematology, Princess Margaret Cancer Centre, Toronto, ON, Canada

6. Department of Human Genetics and UPMC Hillman Cancer Center, University of Pittsburgh Graduate School of Public Health, Pittsburgh, PA, USA
7. Division of Pulmonary, Allergy and Critical Care Medicine, Department of Medicine, University of Pittsburgh School of Medicine, Pittsburgh, PA, USA
8. Department of Health Sciences, Brock University, St. Catharines, Ontario, Canada
9. Department of Molecular Genetics, University of Toronto, Toronto, ON, Canada
10. Department of Statistical Sciences, University of Toronto, Toronto, ON, Canada
11. Department of Computer Science, University of Toronto, Toronto, ON, Canada
12. Ontario Institute of Cancer Research, Toronto, ON, Canada
13. Vector Institute, Toronto, ON, Canada

Corresponding Author: **Rayjean J. Hung** ([rayjean.hung@lunenfeld.ca](mailto:rayjean.hung@lunenfeld.ca))

# Abstract

1

## Purpose

2

Screening with low-dose computed tomography can reduce lung cancer-related mortality. However, most screen-detected pulmonary abnormalities do not develop into cancer and it remains challenging to identify high-risk nodules among those with indeterminate appearance. We aim to develop and validate prediction models to discriminate between benign and malignant pulmonary lesions based on radiological features.

3

4

5

6

7

## Methods

8

Using four international lung cancer screening studies, we extracted 2,060 radiomic features for each of 16,797 nodules among 6,865 participants. After filtering out redundant and low-quality radiomic features, 642 radiomic and 9 epidemiologic features remained for model development. We used cross-validation and grid search to assess three machine learning models (XGBoost, Random Forest, LASSO) for their ability to accurately predict risk of malignancy for pulmonary nodules. We fit the top-performing ML model in the full training set. We report model performance based on the area under the curve (AUC) and calibration metrics in the held-out test set.

9

10

11

12

13

14

15

16

## Results

17

The ML models that yielded the best predictive performance in cross-validation were XGBoost and LASSO, and among these models, LASSO had superior model calibration, which we considered to be the optimal model. We fit the final LASSO model based on the optimized hyperparameter from cross-validation. Our radiomics model was both well-calibrated and had a test-set AUC of 0.930 (95% CI: 0.901-0.957) and out-performed the established Brock model (AUC=0.868, 95% CI: 0.847-0.888) for nodule assessment.

18

19

20

21

22

23

## Conclusion

24

We developed highly-accurate machine learning models based on radiomic and  
epidemiologic features from four international lung cancer screening studies that may be  
suitable for assessing suspicious, but indeterminate, screen-detected pulmonary nodules  
for risk of malignancy.

25

26

27

28

## Introduction

Lung cancer is the leading cause of cancer mortality globally<sup>1</sup>. Only 10-20% lung cancer patients live up to five years after diagnosis<sup>2</sup>. However, several large randomized screening trials have demonstrated that low-dose computed tomography (CT) screening can significantly reduce lung cancer mortality through early detection<sup>3-6</sup>. The National Lung Screening Trial (NLST) observed a 20% reduction in lung cancer-related mortality following CT screening<sup>4</sup>, while the Dutch-Belgian trial (NELSON) observed a reduction in mortality of 24% in men and 33% in women<sup>3</sup>.

Despite the promise of screening, the clinical management of screen-detected pulmonary nodules and the false-positive rate are important determinants for screening program efficacy. Across several studies, the average nodule detection rate was 20%, meanwhile, more than 90% of screen-detected nodules were benign<sup>7</sup>. Inaccurate assessment of indeterminate nodules may lead to unnecessary diagnostic workup, including diagnostic screens (which confer higher radiation dosing), invasive procedures such as bronchoscopy, biopsy, or surgery, and may lead to overdiagnosis of indolent cancers<sup>7</sup>. Excess follow-up carries significant healthcare costs, utilizes critical hospital and human resources, and may lead to adverse events and complications, including death, and can cause anxiety and decreased quality of life for the screened participant.

Several guidelines have been developed to help inform indeterminate nodule management, however, there remains significant heterogeneity in these recommendations<sup>8-22</sup>. To address these issues, probability models have been developed to help identify high-risk lesions and guide clinical decision-making<sup>23-25</sup>. These models have traditionally been based on patient characteristics (e.g., age, smoking history, etc.) and clinically-collected nodule morphology and textural features (e.g., size, attenuation, etc.). These features characterize important aspects of the nodule and are routinely collected as part of the

clinical management of pulmonary findings. 54

Nodule probability models based on routinely-collected patient and nodule information 55  
have shown good performance, however, there is growing interest in leveraging 56  
medical images directly to perform automated quantitative image analysis, enabling 57  
the quantification of hundreds or thousands of radiomic features that may capture 58  
important information otherwise imperceptible to the human eye. Radiomic features 59  
quantify aspects of the 3-dimensional (3D) morphology and grayscale distribution for a 60  
region-of-interest<sup>26</sup>. It is expected that radiomic features, in combination with patient-level 61  
information, will be able to accurately discriminate between benign and malignant 62  
pulmonary nodules beyond what has been achieved with traditional clinical features. 63  
However, it is currently unknown which features will be most important and whether they 64  
will generalize well to other screening populations. 65

The goal of the current study is to perform quantitative image analysis and evaluate 66  
the predictive performance of high-dimensional radiomic features for pulmonary nodule 67  
malignancy assessment, and to develop and validate models using data from several 68  
large independent international lung cancer screening studies. 69

## Methods

70

### Lung Cancer Screening Studies

71

As part of the Integrative Analysis of Lung Cancer Etiology and Risk (INTEGRAL) program, we used data collected by four independent lung cancer screening studies for this analysis: 1. National Lung Screening Trial (NLST), 2. PanCanadian Early Detection of Lung Cancer (PanCan) Study, 3. International Early Lung Cancer Action Program (IELCAP-Toronto), and 4. Pittsburgh Lung Screening Study (PLuSS). Details of each study have been described previously<sup>4, 5, 27–30</sup>. We provide brief descriptions of each study in the following sections. Details about the study protocol used by each study are included in the Supplemental Materials.

72

73

74

75

76

77

78

79

#### National Lung Screening Trial (NLST)

80

NLST was a large randomized multi-center lung cancer screening study comparing low-dose helical CT to standard chest radiography (CXR) for screening adult heavy smokers<sup>4, 5</sup>. Eligible participants were age 55 to 74 years, with 30 or more pack-years history of smoking, and former smokers quitting no more than 15 years prior. NLST enrolled 53,456 participants across 33 centers in the United States in 2002. We only use image data from the CT screening arm in the current study. Positive screen-detected findings were considered as any non-calcified nodules (NCN) with a diameter of 4mm or greater.

81

82

83

84

85

86

87

88

#### Pan-Canadian Early Detection of Lung Cancer Study (PanCan)

89

PanCan was a multi-center, single-arm prospective lung cancer screening study that included 2,537 participants<sup>27</sup>. Participants were recruited from eight sites across Canada. Eligible participants included those 50 to 75 years of age, without a self-reported history of

90

91

92

lung cancer, current or former smokers, an estimated 6-year risk of lung cancer of at least 2% based on an earlier edition of the PLCOm2012 model<sup>31</sup>, and an ECOG performance status of 0 or 1. Screening was performed with multi-detector row CT scanners. Each scan was reviewed by a train radiologist and up to 10 lung nodules were identified and recorded.

### **International Early Lung Cancer Action Program (IELCAP-Toronto)**

IELCAP was an international single-arm multi-centre study evaluating low-dose CT for lung cancer screening of high-risk individuals<sup>28, 29</sup>. A common study protocol was adopted for screening regimen, however, each site were able to make decisions regarding enrollment criteria. The Toronto location (hereafter referred to as IELCAP-Toronto), was based out of Princess Margaret Cancer Centre and began in 2003. IELCAP-Toronto enrolled 4,782 adults age 50 or older who were ever-smokers with more than 10 pack-years history of smoking. Participants were screened at baseline with multi-detector-row CT scanners. Positive findings were considered as any NCN found on a baseline scan.

### **Pittsburgh Lung Screening Study (PLuSS)**

PLuSS was a lung cancer screening trial that recruited 3,642 eligible participants between January 2002 and April 2005<sup>30</sup>. Eligible participants included those age 50 to 79 years, with no personal history of lung cancer, no concurrent participation in other lung screening studies, no chest CT within the preceding year, current or former smoker with 0.5 pack-years history of smoking for at least 25 years, no smoking cessation within 10 years of enrollment, and body weight less than 400 pounds. Participants underwent low-dose chest CT at baseline. Positive findings were considered as any NCN.



## Pulmonary Nodule Segmentation

116

We performed supervised, semi-automated segmentation of screen-detected pulmonary nodules using the open-source 3D Slicer software<sup>32</sup> and the Chest Imaging Platform extension<sup>33, 34</sup>. Our radiologist (HAS) located and reviewed each pulmonary lesion. Upon locating the lesion, the radiologist placed a seed-point at the approximate centroid of the lesion; semi-automated segmentation was performed based on the single seed-point, and manual touch-ups were performed at the discretion of the radiologist to fix over- or under-segmentation. All nodules were reviewed using standard lung windows. Segmentations for PanCan were performed by the PanCan investigators using an automated segmentation algorithm based on a commercial software and images and masks were provided without further processing, except those relevant to the feature extraction, detailed in the following section. We also collected detailed nodule information, including: lung and lobe location, suspicion of nodule malignancy, a nodule-specific LungRADS score (based on LungRADS 1.1,<sup>8</sup>), and ratings for semantic nodule features including: margin, sphericity, subtlety, spiculation, solidity, calcification, structure, and lobulation. Details on the ratings systems for semantic nodule features are described in **Supplementary Table 1**.

117

118

119

120

121

122

123

124

125

126

127

128

129

130

131

132

## Radiomics Feature Extraction

133

We performed radiomic feature extraction for baseline screen-detected pulmonary nodules using PyRadiomics (version 3.0.1)<sup>26</sup>. Due to heterogeneity in image acquisition settings between and within screening studies, all images and masks were resampled and interpolated to have unit voxel spacing (i.e., isotropy). We used a linear interpolator for images and nearest-neighbours interpolator for masks (to preserve labels). Grayscale intensities were discretized into bins using a bin width of 25 for histogram-based features. Voxel intensities were right-shifted by 1000 units prior to feature extraction to avoid

134

135

136

137

138

139

140

negative values during feature computations. 141

Feature classes and the number of features per class were: (1) first-order statistics 142  
[18 features], (2) shape-based [14 features], (3) gray level cooccurrence matrix [24 143  
features], (4) gray level run length matrix [16 features], (5) gray level size zone matrix 144  
[16 features], (6) neighbouring gray tone difference matrix [5 features], and (7) gray level 145  
dependence matrix [14 features]. The list of radiomic features for each class is provided 146  
in **Supplemental Table 2**. We extracted shape and intensity-based features using the 147  
original image. We also extracted intensity-based features from images after applying 148  
several transformations, including: wavelet, Laplacian of Gaussian (LoG), Square, 149  
SquareRoot, Logarithm, Exponential, Gradient, and LocalBinaryPattern3D. In total, we 150  
extracted 2,060 radiomic features per nodule. 151

## **Statistical Analysis** 152

### **Epidemiologic covariates and outcomes** 153

Epidemiologic data were harmonized across the four screening studies to establish a 154  
common set of patient-level covariates. After harmonization, age, sex, family history 155  
of lung cancer among a first-degree relative, history of COPD or emphysema, smoking 156  
status, smoking duration, smoking intensity, years since quitting, and body mass index 157  
were included. We combined epidemiologic and radiomic features from the four screening 158  
studies to form our candidate predictor set. Nodule malignancy status was the outcome 159  
of interest and was determined based on the nodule-specific radiological assessment 160  
described in the Supplemental Methods. 161

### **Model Development** 162

We used subject-level random sampling to split the data into training (80%) and testing 163  
(20%) sets, ensuring all nodules for a specific participant were in the same split. The 164

training set was further split into five folds using subject-level random sampling to perform cross-validation. We had 2,060 radiomic features to assess for their ability to classify benign and malignant pulmonary nodules. Many radiomic features have correspondences to established clinically-collected (i.e., semantic) nodules features, however, many features have an unknown predictive value. We performed an initial set of filtering steps to remove zero variance (n=78), low quality (n=11), and weakly predictive (FDR-adjusted P-value > 0.05 in univariate models, n=248), and highly-redundant features (pairwise correlation > 0.9, n=1,081), described in detail in the Supplemental Methods.

Using the 9 epidemiologic covariates and 647 radiomic features retained after filtering, we performed cross-validation to identify the top-performing ML model. All predictors were normalized prior to model fitting. We assessed the following ML models: penalized logistic regression (LASSO), Random Forest (RF), and Gradient Boosted Trees (XGBoost). We first performed grid-search over a set of hyperparameters chosen using a Latin hypercube space-filling design<sup>35</sup>. We then performed random grid search over a finer set of hyperparameters for the top-performing model. The optimal hyperparameter(s) were then fit to the full training set and model performance was evaluated in the hold-out test set. A schematic of the analytic approach used in this study is presented in **Figure 1**. All statistical analysis was performed using Python 3.7.10 and R 4.0.5<sup>36, 37</sup>.

## **Model Performance**

We evaluated model performance in two complementary ways: (1) area under the receiver operating characteristic curve (AUC) to assess a models ability to assign higher risks to malignant lesions than to benign lesions (i.e., discrimination), and (2) compare model-estimated risks to observed risks (i.e., calibration). For calibration, we compared predicted and observed risks within quantiles of predicted risks, and also assessed the ratio of expected to observed number of cancers and the difference between expected

and observed number of cancers. We report the AUC and calibration metrics with 191  
percentile-based bootstrap confidence intervals. We compared our model against an 192  
established nodule malignancy model (see Supplementary Materials for details). 193

## Results

194

Basic demographics about the participants and nodules in the four lung cancer screening cohorts are presented in **Table 1**. Participants were similar in age between the cohorts. There were more men than women in NLST (57% vs. 43%), PanCan (53% vs. 47%), and PLuSS (51% vs. 49%), while IELCAP-Toronto (61% vs. 39%) had more women. The four cohorts had differing proportions of current and former smokers, and smoking histories (i.e., duration, intensity, and years since quitting) varied between studies. All four cohorts generally consisted of heavy current and former smokers. On average, PanCan had more nodules per participant, and smaller nodules, compared to the other studies.

We excluded 1,284 nodules from our study due technical issues with feature extraction, 2,574 nodules not first-appearing on baseline scans, and another 2,103 nodules due to missing patient-level data for the harmonized set of epidemiologic covariates. In total, we had 16,797 baseline screen-detected nodules among 6,865 participants for our analytic sample. A complete flow chart for nodule inclusion in the analytic sample is presented in **Supplemental Figure 1**. Distributional measures for the radiomic features based on the original CT image are presented in **Supplemental Table 4**.

We started with 2,060 radiomics features for model development. We removed 78 features due to zero-variance and 11 features due to observed numerical instability (i.e., implausible values) for a large number of participants. Next, we fit univariate models for each feature in the training data, and retained features with a FDR-adjusted p-value less than 0.05 (n=248). Lastly, we evaluated all pairwise sets of predictors with correlation in the training set greater than 0.9 (in descending order) and removed the predictor with the larger p-value. We retained 642 radiomic features for model development. More details can be found in the Supplementary Materials and **Supplemental Figure 2**. The 642 radiomics features retained for model development are presented in **Supplemental**

**Table 4.** We performed unsupervised clustering in the training data set using the 642 radiological features which revealed three distinct clusters of participants with similar radiomics profiles (see **Supplemental Figure 3**). We compared the three clusters based on their proportions of malignant pulmonary nodules and found statistically significant differences ( $P_{\text{Exact}} < 0.05$ ).

We fit three different machine learning models (LASSO, XGBoost, Random Forest) using 5-fold cross-validation based on the 642 radiomics features and 9 epidemiologic covariates. We first fit a coarse grid of 50 sets of hyperparameters for each ML model. The results for this first-pass cross-validation are presented in **Table 2** and **Supplemental Figure 4 and 5**. We selected the top performing model (LASSO) based on the combination of discrimination (AUC) and calibration (calibration ratio) and performed a final cross-validation and grid search over a finer grid of hyperparameters. The optimal penalty value for the LASSO, based on CV, was used to fit the final model based on the full training data set, and predictions were made on the held-out test set to evaluate model performance.

The top ML submodels that yielded the highest cross-validated AUC were XGBoost (AUC=0.933, 95% CI: 0.923-0.944), LASSO (AUC=0.930, 95% CI: 0.914-0.946), and Random Forest (AUC=0.916, 95% CI: 0.904-0.929). However, calibration was superior for the LASSO model and was chosen as the top model (see **Supplemental Figure 6**). In total, 142 predictors were retained in the final LASSO model with non-zero coefficients (See **Supplemental Figure 7**).

We compared our model with the established Brock Model. Our radiomics model had better discrimination, with a test-set AUC of 0.93 (95% CI: 0.90-0.96) compared to 0.87 (95% CI: 0.85-0.89) for the Brock Model (see **Figure 2**). Our model demonstrated excellent calibration when comparing observed risks with model-predicted (i.e., expected) risks, within quintiles of predicted risk. Our model had superior calibration compared

to the Brock Model (see **Supplemental Table 5** and **Supplemental Figure 8**). We 245  
estimated the observed and expected number of malignant nodules (per 100,000) for the 246  
Brock model and our radiomics model. Our model had excellent calibration ratios (Exp / 247  
Obs) of 1.02 (95% CI: 0.89-1.18) and calibration differences of 69.39 (95% CI: -399.67, 248  
507.94), versus 1.25 (95% CI: 1.15,1.36) and 1172.89 (95% CI: 774.17, 1583.65) for 249  
the Brock Model, respectively. We compare clinically-relevant metrics (e.g., sensitivity, 250  
specificity, etc.) between our model and the Brock model in **Table 3**. At nearly every 251  
probability threshold, our model has higher sensitivity, specificity, positive predictive value 252  
(PPV), negative predictive value (NPV), and accuracy, while identifying fewer lesions as 253  
positive (i.e., suspicious), when compared to the Brock model. 254

## Discussion

255

We developed and validated a pulmonary nodule malignancy assessment model based on radiomics and epidemiologic data from four large, international lung cancer screening cohorts using a machine learning approach. We found that the top-performing models were based on gradient boosted trees (XGBoost) and penalized logistic regression (LASSO), while the LASSO model provided the most optimal calibration. The use of quantitative imaging features (i.e., radiomics) showed improved performance compared to an established model based primarily on semantic nodule features. Radiomic features have demonstrated value for their ability to predict nodule malignancy risk and may improve the management of screen-detected pulmonary nodules by providing clinicians with supporting information for clinical decision-making.

256

257

258

259

260

261

262

263

264

265

Historically, the large quantity of medical images acquired during lung cancer screening have been under-utilized for extracting important information to inform nodule management. Traditionally, a modest set of semantic nodule traits are qualitatively assessed by expert radiologists to provide a high-level characterization of nodule morphology. High-throughput quantitative image analysis removes this layer of inter-reader subjectivity, while also collecting many more features that may further enhance our ability to characterize nodule morphology and intranodular textural heterogeneity<sup>38</sup>. Radiomic features can describe various aspects of the nodule morphology in ways that are imperceptible to the human eye (i.e., subtle intratumoral textural changes)<sup>26</sup>. The combination of radiomic features with known important patient-level features are expected to improve clinical management of nodules.

266

267

268

269

270

271

272

273

274

275

276

Previous studies demonstrated that quantitative image analysis can identify important prognostic signatures in head and neck cancer<sup>38</sup>. The feature extraction presented in<sup>38</sup> was formalized as a free and open-source software<sup>26</sup> and has enabled transparency

277

278

279



and reproducibility for feature extraction, and contributed to the growing interest in 280  
quantitative image analysis in many areas of medical imaging, including lung cancer 281  
screening. To date, many of the radiomic studies for pulmonary nodule assessment have 282  
been performed based on relatively small data sets and with no ground-truth for nodule 283  
cancer status. Previous studies have shown that radiomic features can help identify lung 284  
cancer subtypes<sup>39, 40</sup> and even the presence of therapy-targetable somatic mutations 285  
(e.g., EGFR, KRAS)<sup>41–45</sup>. The use of non-invasive image features is growing in popularity 286  
and will help improve lung cancer screening program efficiency. 287

To our knowledge, our radiomics study is the largest study to date to systematically 288  
investigate the importance of radiomics for pulmonary nodule assessment. We 289  
performed supervised, semi-automated segmentation of pulmonary nodules for three 290  
lung cancer screening studies using an open-source tool that is available for anyone to 291  
use. Our study was based on 16,797 nodules among 6,865 participants from four lung 292  
cancer screening cohorts. We used a systematic approach to develop machine learning 293  
prediction model using radiomics features that were consistently predictive across each 294  
of these four independent screening cohorts. With increasing usage of computer-aided 295  
diagnostic (CAD) software, the segmentation process can be fully automated. The model 296  
presented here can be easily implemented without additional processing need for a 297  
large-amount of images with the added advantage of minimum inter-reader variability. 298

Our study has several limitations worth highlighting. First, ground-truth nodule-level 299  
malignancy status was unavailable for two of the screening studies (NLST, PLuSS). As 300  
such, we used a set of rules to assign nodule-level malignancy status for participants with 301  
a lung cancer diagnosis. Imperfect assignment will lead to missclassification errors that 302  
can bias the results of our study. However, we used a relatively conservative approach 303  
based on suspicion of malignancy determined by expert review of nodules by our 304  
radiologist, who has extensive experience in lung CT assessment. For this reason, we 305

believe the potential for missclassification bias is limited. There were feature extraction 306  
issues that excluded 5.7% of the candidate nodules. Nearly 80% of these issues were 307  
due to very small nodules with segmentation masks containing only a single voxel or 308  
were 1-dimensional after resampling and interpolation. These micronodules have a very 309  
low prior probability of being malignant and their exclusion are unlikely to bias our results. 310  
Lastly, there was numerical instability for a small set of radiomic features when computing 311  
on derived images (i.e., after transformations). We minimized potential bias from these 312  
unstable features by excluding them for the filters where identifiable problems arose. All 313  
radiomic features appeared stable based on the original image. 314

In summary, we developed a nodule assessment model based on quantitative imaging 315  
and patient-level features collected from four international lung cancer screening cohorts. 316  
We believe this study contributes important insights into the role that high-dimensional 317  
radiomic features can play in accurately assessing nodule malignancy risk and that 318  
these features generalize well to geo-temporally distinct screening cohorts. At present, 319  
there is emerging interest in analyzing medical images using deep learning computer 320  
vision approaches, although limited transparency in model development and lack of 321  
model interpretability can pose challenges for clinical implementation and widespread 322  
adoption<sup>46, 47</sup>. In the future, our model may help to improve nodule malignancy 323  
assessment and provide supplemental information that can help guide decision-making 324  
for screen-detected nodule management. 325

## References

1. Sung H, Ferlay J, Siegel RL, et al: Global cancer statistics 2020: GLOBOCAN estimates of incidence and mortality worldwide for 36 cancers in 185 countries. *CA: a cancer journal for clinicians*, 2021
2. Howlader N, Noone A, Krapcho M, et al: SEER cancer statistics review, 1975-2014, national cancer institute. Bethesda, MD 1–12, 2017
3. Koning HJ de, Aalst CM van der, Jong PA de, et al: Reduced lung-cancer mortality with volume CT screening in a randomized trial. *New England Journal of Medicine* 382:503–513, 2020
4. Team NLSTR: Reduced lung-cancer mortality with low-dose computed tomographic screening. *New England Journal of Medicine* 365:395–409, 2011
5. National Lung Screening Trial Research Team: Lung cancer incidence and mortality with extended follow-up in the national lung screening trial. *Journal of Thoracic Oncology* 14:1732–1742, 2019
6. Pastorino U, Silva M, Sestini S, et al: Prolonged lung cancer screening reduced 10-year mortality in the MILD trial: New confirmation of lung cancer screening efficacy. *Annals of Oncology* 30:1162–1169, 2019
7. Bach PB, Mirkin JN, Oliver TK, et al: Benefits and harms of CT screening for lung cancer: A systematic review. *Jama* 307:2418–2429, 2012
8. American College of Radiology Committee on Lung-RADS: Lung-RADS assessment categories version 1.1. Available at <https://www.acr.org/-/media/ACR/Files/RADS/Lung-RADS/LungRADSAssessmentCategoriesv1-1.pdf%20>
9. I-ELCAP protocol. Available at <https://www.ielcap.org/sites/default/files/I-ELCAP-protocol-summary.pdf>
10. Xu DM, Gietema H, Koning H de, et al: Nodule management protocol of the NELSON randomised lung cancer screening trial. *Lung cancer* 54:177–184, 2006

11. Horeweg N, Rosmalen J van, Heuvelmans MA, et al: Lung cancer probability in patients with CT-detected pulmonary nodules: A prespecified analysis of data from the NELSON trial of low-dose CT screening. *The Lancet Oncology* 15:1332–1341, 2014
12. Oudkerk M, Devaraj A, Vliegenthart R, et al: European position statement on lung cancer screening. *The Lancet Oncology* 18:e754–e766, 2017
13. Callister M, Baldwin D, Akram A, et al: British thoracic society guidelines for the investigation and management of pulmonary nodules: Accredited by NICE. *Thorax* 70:ii1–ii54, 2015
14. Baldwin DR, Callister ME: The british thoracic society guidelines on the investigation and management of pulmonary nodules. *Thorax* 70:794–798, 2015
15. Yip R, Henschke CI, Yankelevitz DF, et al: CT screening for lung cancer: Alternative definitions of positive test result based on the national lung screening trial and international early lung cancer action program databases. *Radiology* 273:591–596, 2014
16. NCCN practice guidelines in oncology lung cancer screening guideline version 4.2019. [https://www.nccn.org/professionals/physician\\_gls/default.aspx](https://www.nccn.org/professionals/physician_gls/default.aspx)
17. Zhou Q, Fan Y, Wang Y, et al: Guidelines for low-dose spiral CT screening of lung cancer in china (2018 edition). *Zhongguo Fei Ai Za Zhi* 21:67–75, 2018
18. Bueno J, Landeras L, Chung JH: Updated fleischner society guidelines for managing incidental pulmonary nodules: Common questions and challenging scenarios. *Radiographics* 38:1337–1350, 2018
19. MacMahon H, Naidich DP, Goo JM, et al: Guidelines for management of incidental pulmonary nodules detected on CT images: From the fleischner society 2017. *Radiology* 284:228–243, 2017
20. Tammemagi MC, Lam S: Screening for lung cancer using low dose computed tomography. *Bmj* 348, 2014
21. Lim KP, Marshall H, Tammemägi M, et al: Protocol and rationale for the international lung screening trial. *Annals of the American Thoracic Society* 17:503–512, 2020

- 22.** Kakinuma R, Ashizawa K, Kusunoki Y, et al: The pulmonary nodules management committee of the Japanese Society of CT Screening. Guidelines for the management of pulmonary nodules detected by low-dose CT lung cancer screening version 3 379
- 23.** Toumazis I, Bastani M, Han SS, et al: Risk-based lung cancer screening: A systematic review. *Lung Cancer* 147:154–186, 2020 380
- 24.** Fox AH, Tanner NT: Approaches to lung nodule risk assessment: Clinician intuition versus prediction models. *Journal of Thoracic Disease* 12:3296, 2020 381
- 25.** Loverdos K, Fotiadis A, Kontogianni C, et al: Lung nodules: A comprehensive review on current approach and management. *Annals of Thoracic Medicine* 14:226, 2019 382
- 26.** Van Griethuysen JJ, Fedorov A, Parmar C, et al: Computational radiomics system to decode the radiographic phenotype. *Cancer Research* 77:e104–e107, 2017 383
- 27.** Tammemägi MC, Schmidt H, Martel S, et al: Participant selection for lung cancer screening by risk modelling (the pan-canadian early detection of lung cancer [PanCan] study): A single-arm, prospective study. *The Lancet Oncology* 18:1523–1531, 2017 384
- 28.** Roberts HC, Patsios D, Paul NS, et al: Lung cancer screening with low-dose computed tomography: Canadian experience. *Canadian Association of Radiologists Journal* 58:225, 2007 385
- 29.** Menezes RJ, Roberts HC, Paul NS, et al: Lung cancer screening using low-dose computed tomography in at-risk individuals: The Toronto experience. *Lung Cancer* 67:177–183, 2010 386
- 30.** Wilson DO, Weissfeld JL, Fuhrman CR, et al: The Pittsburgh lung screening study (PLUSS) outcomes within 3 years of a first computed tomography scan. *American Journal of Respiratory and Critical Care Medicine* 178:956–961, 2008 387
- 31.** Tammemägi MC, Katki HA, Hocking WG, et al: Selection criteria for lung-cancer screening. *New England Journal of Medicine* 368:728–736, 2013 388
- 32.** Fedorov A, Beichel R, Kalpathy-Cramer J, et al: 3D slicer as an image computing platform for the quantitative imaging network. *Magnetic Resonance Imaging* 389

- 30:1323–1341, 2012 406
- 33.** San Jose Estepar R, Ross JC, Harmouche R, et al: Chest imaging platform: An open-source library and workstation for quantitative chest imaging, in C66. Lung imaging II: New probes and emerging technologies. American Thoracic Society, 2015, pp A4975–A4975 407  
408  
409  
410
- 34.** Krishnan K, Ibanez L, Turner WD, et al: An open-source toolkit for the volumetric measurement of CT lung lesions. Optics Express 18:15256–15266, 2010 411  
412
- 35.** McKay MD, Beckman RJ, Conover WJ: A comparison of three methods for selecting values of input variables in the analysis of output from a computer code [Internet]. Technometrics 21:239–245, 1979[cited 2022 Apr 6] Available from: <http://www.jstor.org/stable/1268522> 413  
414  
415  
416
- 36.** Van Rossum G, Drake FL: Python 3 reference manual. Scotts Valley, CA, CreateSpace, 2009 417  
418
- 37.** R Core Team: R: A language and environment for statistical computing [Internet]. Vienna, Austria, R Foundation for Statistical Computing, 2021 Available from: <https://www.R-project.org/> 419  
420  
421
- 38.** Aerts HJ, Velazquez ER, Leijenaar RT, et al: Decoding tumour phenotype by noninvasive imaging using a quantitative radiomics approach. Nature communications 5:1–9, 2014 422  
423  
424
- 39.** Li H, Gao L, Ma H, et al: Radiomics-based features for prediction of histological subtypes in central lung cancer. Frontiers in Oncology 11:1522, 2021 425  
426
- 40.** Linning E, Lu L, Li L, et al: Radiomics for classifying histological subtypes of lung cancer based on multiphasic contrast-enhanced computed tomography. Journal of computer assisted tomography 43:300, 2019 427  
428  
429
- 41.** Wu S, Shen G, Mao J, et al: CT radiomics in predicting EGFR mutation in non-small cell lung cancer: A single institutional study. Frontiers in Oncology 2044, 2020 430  
431
- 42.** Hong D, Xu K, Zhang L, et al: Radiomics signature as a predictive factor for EGFR 432

- mutations in advanced lung adenocarcinoma. *Frontiers in oncology* 10:28, 2020 433
- 43.** Jia T-Y, Xiong J-F, Li X-Y, et al: Identifying EGFR mutations in lung adenocarcinoma 434  
by noninvasive imaging using radiomics features and random forest modeling. *European* 435  
*radiology* 29:4742–4750, 2019 436
- 44.** Velazquez ER, Parmar C, Liu Y, et al: Somatic mutations drive distinct imaging 437  
phenotypes in lung cancer. *Cancer research* 77:3922–3930, 2017 438
- 45.** Liu Y, Kim J, Balagurunathan Y, et al: Radiomic features are associated with EGFR 439  
mutation status in lung adenocarcinomas. *Clinical lung cancer* 17:441–448, 2016 440
- 46.** Lam S, Bryant H, Donahoe L, et al: Management of screen-detected lung nodules: 441  
A canadian partnership against cancer guidance document. *Canadian Journal of* 442  
*Respiratory, Critical Care, and Sleep Medicine* 4:236–265, 2020 443
- 47.** Massion PP, Antic S, Ather S, et al: Assessing the accuracy of a deep learning 444  
method to risk stratify indeterminate pulmonary nodules. *American journal of respiratory* 445  
*and critical care medicine* 202:241–249, 2020 446

**Table 1.** Patient-level and nodule-level descriptive statistics for each of the four screening cohorts included in this study. Means and standard deviations are reported for numeric variables and counts and proportions are reported for categorical variables.

|                                      | <b>Total Participants (N = 6,865)</b> |                             |                               |                              |
|--------------------------------------|---------------------------------------|-----------------------------|-------------------------------|------------------------------|
|                                      | <b>IELCAP-Toronto<br/>(n = 502)</b>   | <b>NLST<br/>(n = 3,743)</b> | <b>PanCan<br/>(n = 1,785)</b> | <b>PLuSS<br/>(n = 835)</b>   |
| No. lung cancers (%)                 | 12 (2.4%)                             | 336 (9.0%)                  | 40 (2.2%)                     | 51 (6.1%)                    |
| Age (years)                          | 62.8 [7.5]                            | 62.4 [5.3]                  | 63.2 [6.0]                    | 60.5 [7.0]                   |
| Sex                                  |                                       |                             |                               |                              |
| Male                                 | 194 (38.6%)                           | 2,149 (57.4%)               | 953 (53.4%)                   | 426 (51.0%)                  |
| Female                               | 308 (61.4%)                           | 1,594 (42.6%)               | 832 (46.6%)                   | 309 (49.0%)                  |
| Body mass index (kg/m <sup>2</sup> ) | 26.4 [4.4]                            | 27.5 [4.9]                  | 26.6 [4.5]                    | 28.1 [5.3]                   |
| Family history of lung cancer        |                                       |                             |                               |                              |
| No                                   | 388 (77.3%)                           | 2,894 (77.3%)               | 1,288 (72.2%)                 | 190 (82.6%)                  |
| Yes                                  | 114 (22.7%)                           | 849 (22.7%)                 | 497 (27.8%)                   | 145 (17.4%)                  |
| History of COPD or Emphysema         |                                       |                             |                               |                              |
| No                                   | 430 (85.7%)                           | 3,232 (86.3%)               | 1,496 (83.8%)                 | 740 (88.6%)                  |
| Yes                                  | 72 (14.3%)                            | 511 (13.7%)                 | 289 (16.2%)                   | 95(11.4%)                    |
| Smoking status                       |                                       |                             |                               |                              |
| Current                              | 66 (13.1%)                            | 1,845 (49.3%)               | 1,133 (63.5%)                 | 580 (69.5%)                  |
| Former                               | 436 (86.9%)                           | 1,898 (50.7%)               | 652 (36.5%)                   | 255 (30.5%)                  |
| Years smoked                         | 30.6 [10.7]                           | 40.9 [7.5]                  | 42.6 [8.8]                    | 40.9 [7.9]                   |
| Cigarettes per day                   | 21.3 [9.9]                            | 28.4 [11.4]                 | 24.7 [10.5]                   | 25.9 [9.8]                   |
| Years since cessation                | 14.5 [10.6]                           | 19.9 [20.3]                 | 2.6 [5.7]                     | 2.0 [3.5]                    |
|                                      | <b>Total Nodules (N = 16,797)</b>     |                             |                               |                              |
|                                      | <b>IELCAP-Toronto<br/>(n = 1,062)</b> | <b>NLST<br/>(n = 6,108)</b> | <b>PanCan<br/>(n = 8,422)</b> | <b>PLuSS<br/>(n = 1,205)</b> |
| Nodules per participant              | 3.2 [2.0]                             | 2.4 [1.7]                   | 8.0 [5.2]                     | 2.0 [1.4]                    |
| Major axis length (mm)               | 9.1 [5.2]                             | 11.0 [8.7]                  | 5.5 [4.5]                     | 12.5 [8.0]                   |
| Least axis length (mm)               | 5.2 [2.7]                             | 5.8 [3.8]                   | 2.6 [2.4]                     | 6.6 [3.9]                    |
| Mesh Volume (mm <sup>3</sup> )       | 446.5 [2,172.8]                       | 872.1 [5,202.0]             | 168.4 [1,914.6]               | 1,171.8 [6,489.3]            |
| Sphericity                           | 0.76 [0.08]                           | 0.73 [0.10]                 | 0.79 [0.08]                   | 0.72 [0.09]                  |

Abbreviations: COPD, chronic obstructive pulmonary disease; IELCAP, International Early Lung Cancer Action Plan; mm, millimeter; NLST, National Lung Screening Trial; No., number; PanCan, PanCanadian Early Detection of Lung Cancer Study; PLuSS, Pittsburgh Lung Screening Study.



**Table 2.** Area under the receiver operating characteristic curve (AUC) based on the K-fold cross-validation of three different machine learning classification models for nodule malignancy prediction based on epidemiologic and radiomic features. We present the cross-validated AUC and confidence intervals.

| <b>ML Model</b>    | <b>Optimal hyperparameters</b>                                                                                                                   | <b>CV-AUC (95% CI)</b> |
|--------------------|--------------------------------------------------------------------------------------------------------------------------------------------------|------------------------|
| XGBoost            | Num. of trees = 149<br>Tree depth = 11<br>Minimum node size = 15<br>Num. of predictors = 452<br>Learning rate = 0.0673<br>Loss reduction = 4.315 | 0.933 (0.923-0.944)    |
| LASSO <sup>1</sup> | Penalty = 0.00044                                                                                                                                | 0.930 (0.914-0.946)    |
| Random Forest      | Num. of trees = 147<br>Num. of predictors = 53<br>Minimum node size = 26                                                                         | 0.916 (0.904-0.929)    |

Abbreviations: AUC, area under the curve; CI, confidence interval; LASSO, least absolute shrinkage and selection operator; ML, machine learning; Num, number; XGBoost, eXtreme Gradient Boosting.

<sup>1</sup> The penalty parameter for the LASSO model was a L1 (i.e., LASSO) penalty.

**Table 3.** Comparison of sensitivity, specificity, positive predictive value, negative predictive value, accuracy, and positive prevalence between our radiomics model and the established Brock Model. We provide point estimates and 95% percentile-based bootstrap confidence intervals for each statistic.

| Probability Threshold       | Sensitivity (%)  | Specificity (%)  | PPV (%)          | NPV (%)          | Accuracy (%)     | Positive Prevalence (%) |
|-----------------------------|------------------|------------------|------------------|------------------|------------------|-------------------------|
| Radiomics <sup>1</sup>      |                  |                  |                  |                  |                  |                         |
| ≥2%                         | 89.7 (83.8-95.1) | 81.6 (80.3-82.9) | 13.8 (11.4-16.6) | 99.6 (99.4-99.8) | 81.9 (80.6-83.2) | 20.6 (19.4-22.0)        |
| ≥5%                         | 82.2 (75.2-89.4) | 90.9 (89.9-91.8) | 23.0 (19.1-27.4) | 99.4 (99.1-99.6) | 90.7 (89.6-91.6) | 11.4 (10.4-12.5)        |
| ≥10%                        | 74.8 (66.7-82.6) | 94.7 (94.0-95.5) | 31.9 (26.4-37.9) | 99.1 (98.8-99.5) | 94.1 (93.3-94.9) | 7.5 (6.6-8.4)           |
| ≥15%                        | 64.5 (56.1-73.4) | 96.7 (96.1-97.3) | 39.2 (32.4-47.0) | 98.8 (98.4-99.2) | 95.7 (95.0-96.3) | 5.2 (4.5-6.0)           |
| ≥20%                        | 61.7 (53.3-70.8) | 97.8 (97.2-98.3) | 47.5 (39.3-56.2) | 98.7 (98.4-99.1) | 96.6 (96.0-97.2) | 4.1 (3.4-4.8)           |
| ≥25%                        | 55.1 (45.8-64.6) | 98.5 (98.0-98.9) | 54.6 (45.2-64.1) | 98.5 (98.1-98.9) | 97.1 (96.6-97.7) | 3.2 (2.6-3.8)           |
| 26 Brock Model <sup>2</sup> |                  |                  |                  |                  |                  |                         |
| ≥2%                         | 87.7 (84.7-90.6) | 64.5 (63.5-65.5) | 10.9 (9.9-12.1)  | 99.1 (98.8-99.3) | 65.6 (64.7-66.6) | 38.0 (37.0-39.0)        |
| ≥5%                         | 80.6 (76.9-84.0) | 79.8 (78.9-80.7) | 16.6 (15.0-18.3) | 98.8 (98.5-99.0) | 79.9 (79.0-80.7) | 23.0 (22.2-23.9)        |
| ≥10%                        | 72.3 (68.1-76.5) | 88.0 (87.3-88.7) | 23.0 (20.6-25.6) | 98.5 (98.2-98.7) | 87.3 (86.5-88.0) | 14.9 (14.1-15.6)        |
| ≥15%                        | 65.0 (60.6-69.4) | 91.6 (91.0-92.2) | 27.7 (24.9-30.7) | 98.1 (97.8-98.4) | 90.3 (89.7-91.0) | 11.1 (10.4-11.7)        |
| ≥20%                        | 58.3 (53.6-63.0) | 93.7 (93.2-94.2) | 31.5 (28.2-34.9) | 97.8 (97.5-98.2) | 92.0 (91.5-92.6) | 8.8 (8.1-9.3)           |
| ≥25%                        | 51.7 (47.0-56.3) | 94.9 (94.5-95.4) | 33.7 (30.0-37.4) | 97.5 (97.2-97.9) | 92.9 (92.4-93.4) | 7.3 (6.7-7.8)           |

Abbreviations: NPV, negative predictive value; PPV, positive predictive value.

Note: Sensitivity is the proportion of malignant nodules correctly identified as malignant. Specificity is the proportion of benign nodules correctly identified as benign. PPV is the proportion of positive predictions that are malignant nodules. NPV is the proportion of negative predictions that are benign nodules. Accuracy is the total number of correct predictions out of the total number of nodules. Positive prevalence is the proportion of positive predictions divided by the total number of predictions.

<sup>1</sup> The radiomics model was evaluated in the 20% hold-out test data not used for model development (N = 3,363).

<sup>2</sup> The Brock Model was evaluated in the entire eligible set of participants from IELCAP-Toronto, NLST, and PLuSS (N = 8,622).

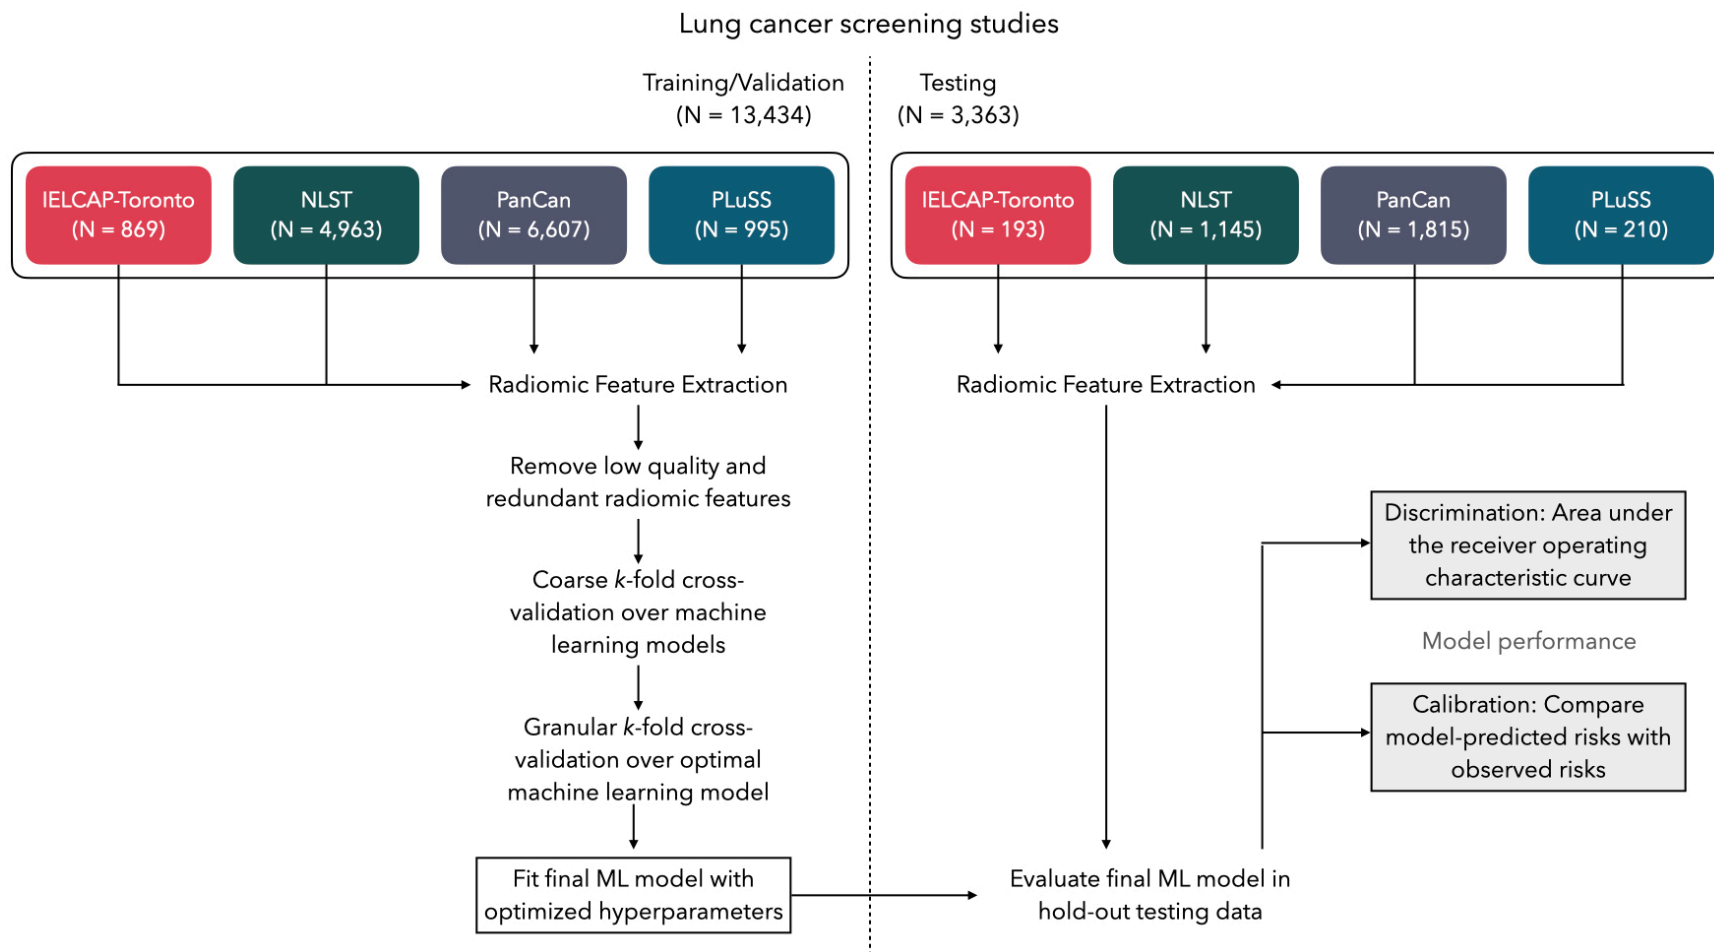

**Figure 1.** Schematic for the analytic framework used in this study. Data were partitioned into training/validation and testing splits using group-based random sampling to ensure all nodules for a participant were in a single set to avoid data leakage. Radiomic features were extracted and subject to filtering to exclude low-quality and highly-redundant features. K-fold cross-validation was performed to identify the optimal machine learning (ML) model and the optimal set of hyperparameters. The final ML model was fitted to the entire training data set and tested for out-of-sample performance in the hold-out test data; discrimination and calibration performance metrics are reported.

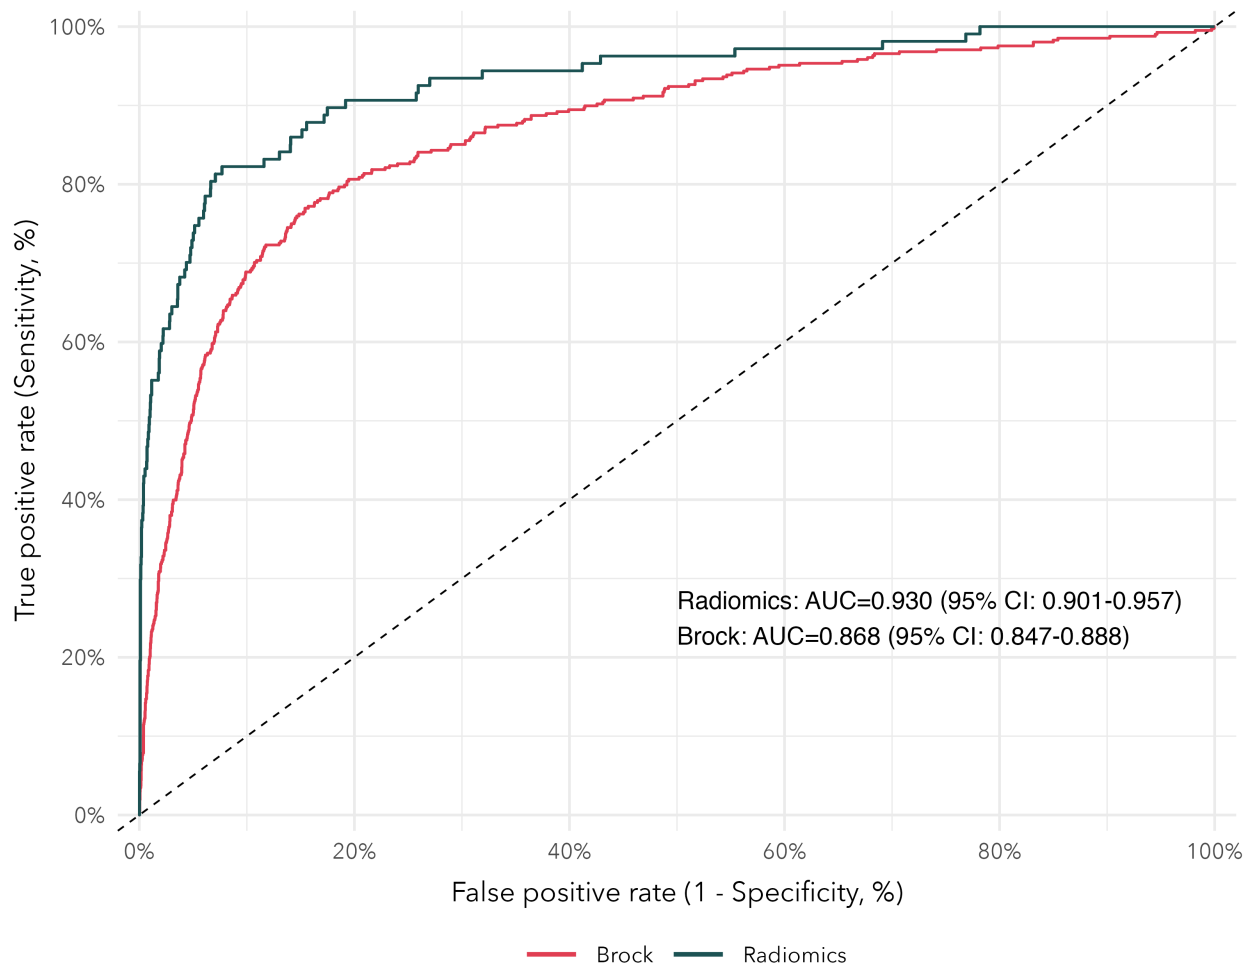

**Figure 2.** Receiver operating characteristic (ROC) curves for our radiomics models and the established Brock Model. Area under the curve (AUC) and 95% confidence intervals are reported.
